# Supplementary material for: Testosterone meets albumin – the molecular mechanism of sex hormone transport by serum albumins
Source: Royal Society of Chemistry journal article supplement (doi:10.1039/c8sc04397c), 2018-12-17
Supplement: c8sc04397c1.pdf [file c8sc04397c1.pdf]

## 1. Supplemental Data

**Table S1.** Retention factors for testosterone on immobilized HSA and control columns in the presence of various mobile phases<sup>a</sup>.

| Mobile phase                         | Retention factor on HSA column <sup>b</sup> | Retention factor on control column <sup>b</sup> | Retention factor due to HSA <sup>c</sup> |
|--------------------------------------|---------------------------------------------|-------------------------------------------------|------------------------------------------|
| 67 mM phosphate buffer (KPB, pH 7.4) | 26.6 (± 4.0)                                | 4.4 (± 0.7)                                     | 22.2 (± 4.1)                             |
| KPB (pH 7.4) + 40 μM citrate         | 16.7 (± 0.9)                                | 5.9 (± 0.1)                                     | 10.8 (± 1.1)                             |
| KPB (pH 7.4) + 20% DMSO              | 14.2 (± 1.2)                                | 4.0 (± 0.3)                                     | 10.2 (± 1.2)                             |

<sup>a</sup>All values in parentheses are a range of ± 1 S.D. ( $n = 3-4$ ).

<sup>b</sup>The retention factor ( $k$ ) on the HSA column or control column was calculated by using the relationship  $k = (t_R - t_M)/t_M$ , where  $t_R$  is the retention time for testosterone on the column and  $t_M$  is the column void time (e.g., as measured by using sodium nitrate).

<sup>c</sup>The retention factor for testosterone due to only HSA was found by calculating the difference between the retention factors that were measured on the HSA column and the control column.

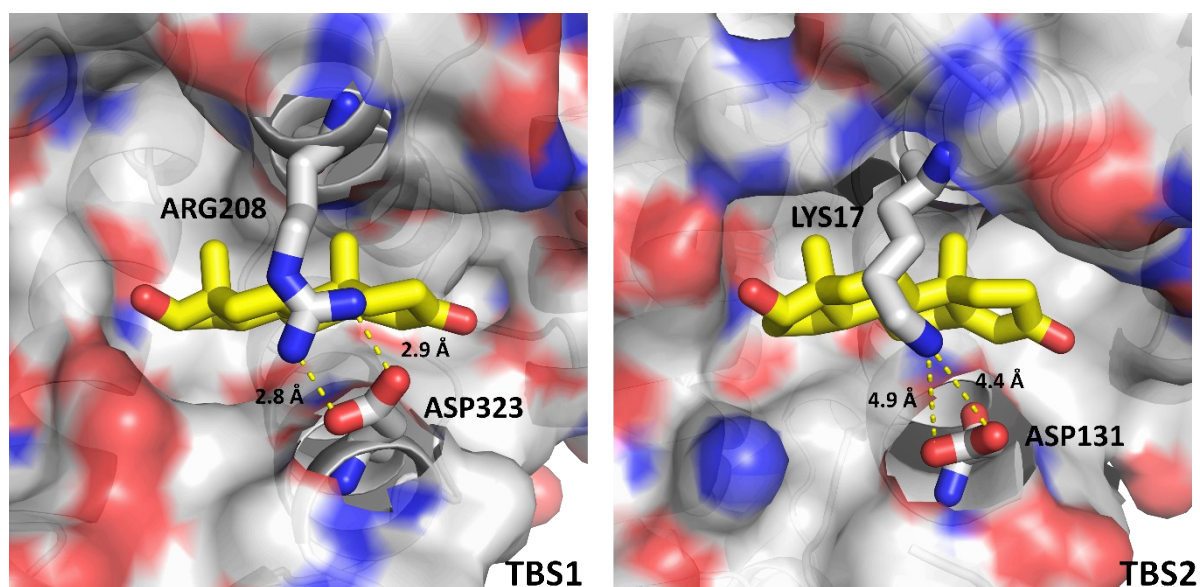

**Figure S1.** Testosterone binding sites are protected by non-covalent interactions between Arg208 and Asp323 in TBS1 and Lys17 and Asp131 in TBS2. The color of the protein surface indicates the character of the environment, and the color scheme is as follows: gray for carbon atoms in ESA, red for oxygen atoms, and blue for nitrogen atoms. Testosterone's carbon atoms are shown in yellow.



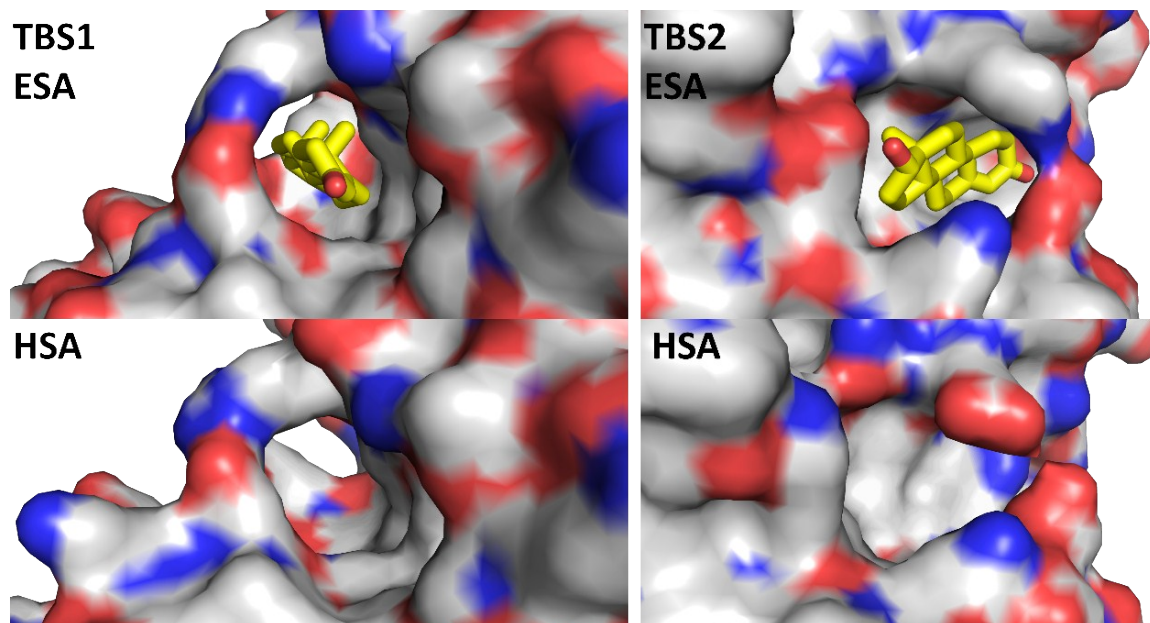

**Figure S3.** Comparison of environment's character of TBS1 and TBS2 in ESA and HSA. The color of the protein surface indicates the character of the environment, and the color scheme is as follows: gray for carbon atoms in ESA and HSA, red for oxygen atoms, and blue for nitrogen atoms. Testosterone's carbon atoms are shown in yellow.
